# Supplementary material for: FBXO28 promotes the malignancy of non-small cell lung cancer through ubiquitination-mediated activation of BRD4
Source: Research Square preprint supplement (doi:10.21203/rs.3.rs-3615557/v1), 2024-04-19
Supplement: Supplementary file 1 [file c37525f4592d9330149843ec.docx]

Table S1

|  |  | FBXO28 expression | | Chi-square test | |
| --- | --- | --- | --- | --- | --- |
| Characteristics | n | Low No. case （%） | High No. case （%） | p value | χ2 |
| Gender | | | | | |
| Male | 48 | 10 | 38 | 0.614 | 0.254 |
| Female | 42 | 7 | 35 |  |  |
| Age |  |  |  |  |  |
| ≤ 60 | 45 | 6 | 39 | 0.178 | 1.813 |
| > 60 | 45 | 11 | 34 |  |  |
| Clinical Stage | | | | | |
| I+ II | 64 | 16 | 48 | 0.02 | 5.4 |
| III+ IV | 26 | 1 | 25 |  |  |
| T classification | | | | | |
| T1+ T2 | 80 | 15 | 65 | 1 | 0.924 |
| T3+ T4 | 10 | 2 | 8 |  |  |
| N classification | | | | | |
| N0 | 56 | 12 | 44 | 0.43 | 0.624 |
| N1 + N2+ N3 | 34 | 5 | 29 |  |  |
| Tumor size (cm) | | | | | |
| ≤ 2 | 18 | 5 | 13 | 1.16 | 0.318 |
| > 2 | 72 | 12 | 60 |  |  |

Table S3

| Gene | Primers for qRT-PCR |
| --- | --- |
| c-JUN  KRAS  ARAF  XRCC5  GAPDH  FBXO28  EIF4E | F: TGACTGCAAAGATGGAAACG  R: CAGGTCATGCTCTGTTTCA  F: CAGTAGACACAAAACAGGCTCAG  R: TGTCGGATCTCCCTCACCAATG  F: CCCACATTCCAAGTCACCAGCA  R: CCTCCCAGTAATAGCCTGAGTC  F: GTGCGGTCGGGGAATAAGG  R: GGGGATTCTATACCAGGAATGGA  F: GCACCGTCAAGGCTGAGAAC  R: TGGTGAAGACGCCAGTGGA  F: AGCCATCGAGAACATCCTCAGC  R: CCTGATTCAACATTCTCTGGCAG  F: CCTACAGAACAGATGGGCACTC  R: GCCCAAAAGTCTTCAACAGTATCA |
| Gene | Primers for ChIP-qPCR |
| FBXO28 | ChIP-F: CCATAGATTTAGTTGCCCTGTC  ChIP-R: GCACGAGTTGCGTTTGAG |
| ARAF | ChIP-F: CTCCTAGAGCTGGTGAACATCG  ChIP-R: AACCCCAACAGTGGCATAGAC |
| XRCC5 | ChIP-F: GATGCGGGCTGGACAAA  ChIP-R: GAAAATGGGATGCACAAACG |
| EIF4E | ChIP-F: CTCCACTTCCCAGAAGCCTCTTG  ChIP-R: CGGTTCCACAGTCGCCATCTTAG |

Table S4

| Cat.No | Antibody Name | Source |
| --- | --- | --- |
| 3724S | HA-tag | CST |
| h00023219-b01p | FBXO28 | Abnova |
| 20536-1-AP | β-actin | proteintech |
| ab128874 | BRD4 | Abcam |
| 3724 | Flag-tag | CST |
| 13987 | Myc-tag | CST |
| A2095 | HA agarose | Sigma-Aldrich |
| A2220 | ANTI-FLAG M2 Affinity Gel | Sigma-Aldrich |
| sc-500771  88803 | Myc agarose  Protein A/G Magnetic Beads | Santa Cruz  Thermo Scientific |
